# Supplementary material for: Substrate Stiffness-Driven Membrane Tension Modulates Vesicular Trafficking via Caveolin-1
Source: PubMed Central journal article supplement (PMC9007531; doi:10.1021/acsnano.1c10534), 2022-03-07
Supplement: nn1c10534_si_001.pdf [file nn1c10534_si_001.pdf]

# Substrate stiffness-driven membrane tension modulates vesicular trafficking via caveolin-1

*Dariusz Lachowski, Carlos Matellan, Sahana Gopal, Ernesto Cortes, Benjamin K. Robinson, Alberto Saiani, Aline F. Miller, Molly M. Stevens and Armando E. del Río Hernández*

**Supplementary Figure S1.** Cytoskeleton stiffness increases in response to elevated substrate stiffness.

**Supplementary Figure S2.** Membrane tension in mouse epithelioid cell line.

**Supplementary Figure S3.** Caveolae diameter in different conditions.

**Supplementary Figure S4.** TIMP-1 GFP plasma membrane localization.

**Supplementary Figure S5.** mRNA expression of TIMP-1 assayed by RT-qPCR.

**Supplementary Figure S6.** Quantification of Caveolin-1 (CAV-1) expression in HSCs.

**Supplementary Figure S7.**  $\beta$ 1 Integrin blocking downregulates TIMP-1 on 3D self-assembling peptide gels mimicking healthy and fibrotic stiffnesses.

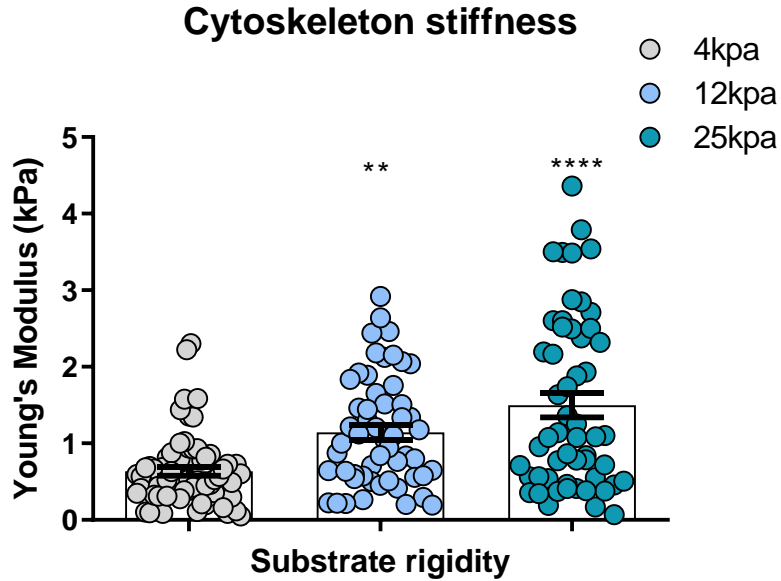

**Supplementary Figure 1. Cytoskeleton stiffness increases in response to elevated substrate stiffness.** Hepatic stellate cells membrane stiffness on 4, 12 and 25 kPa polyacrylamide substrates measured as Young's Modulus. Histogram bars represent mean  $\pm$  s.e.m. Data are representative of 3 independent experiments and 100 cells analysed. Markers denote significant difference from 4 kPa condition by ANOVA with Dunnett's post hoc test, \*\*  $0.001 < p < 0.01$ , \*\*\*\*  $p < 0.0001$ .

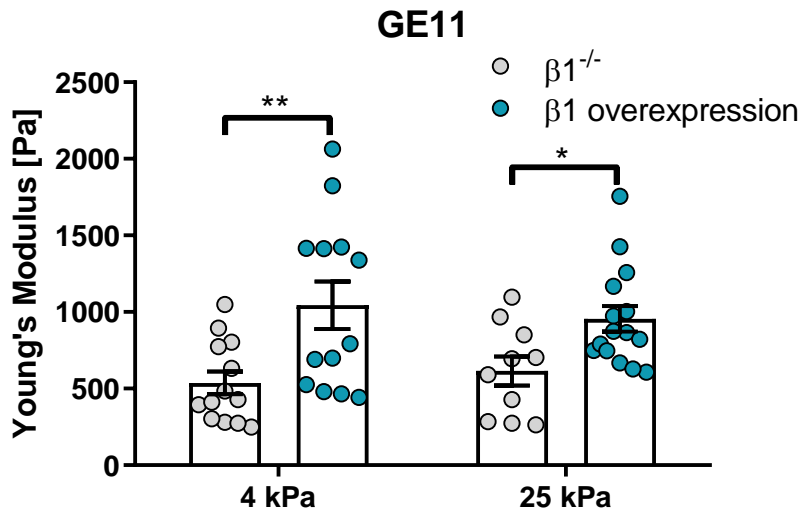

**Supplementary Figure S2. Membrane tension in mouse epithelioid cell line.** Membrane stiffness measured by AFM in integrin  $\beta 1^{-/-}$  and integrin  $\beta 1$  overexpressing mouse epithelioid cell line cultured on 4 kPa and 25 kPa polyacrylamide substrates. In both cases,  $\beta 1$  integrin knockdown cells present a significantly lower membrane tension compared to cells overexpressing integrin  $\beta 1$ . Data are representative of 3 independent experiments. \*\*  $0.001 < p < 0.01$ , \*\*\*\*  $p < 0.0001$ .

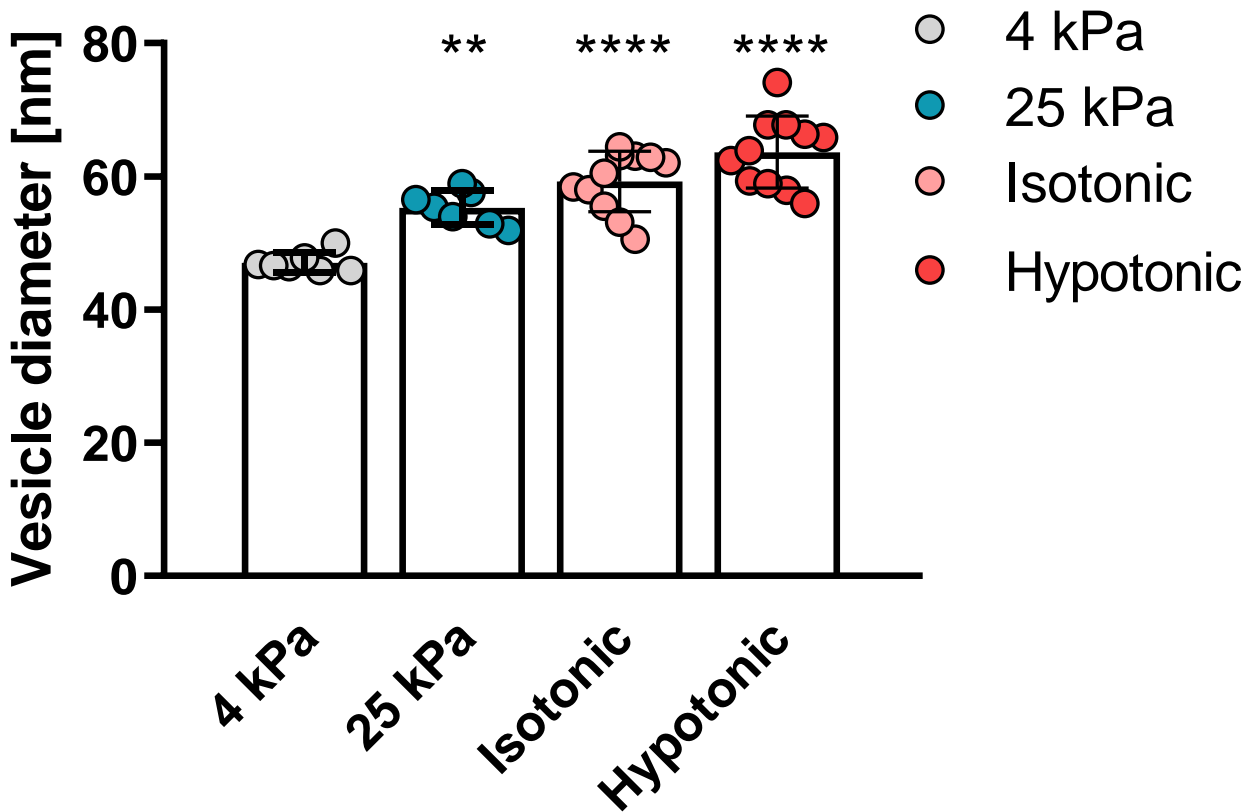

**Supplementary figure S3. Caveolae diameter in different conditions.** Membrane vesicle diameter the cells on 4 and 25 kPa polyacrylamide substrates, isotonic and hypotonic media represented on Figure 4 (A) and Figure 5 (A). Histogram bars represent mean  $\pm$  s.e.m; dots represent individual data points. Data are representative of averages of 7 sections from 3 cells for 4 and 25 kPa each and averages of 11 sections from 3 cells for isotonic and hypotonic each. Markers denote significant difference from 4 kPa condition by ANOVA with Dunnett's post hoc test, \*\*  $0.001 < p < 0.01$ , \*\*\*\*  $p < 0.0001$ .

## TIMP-1 GFP/PM RFP signal colocalization

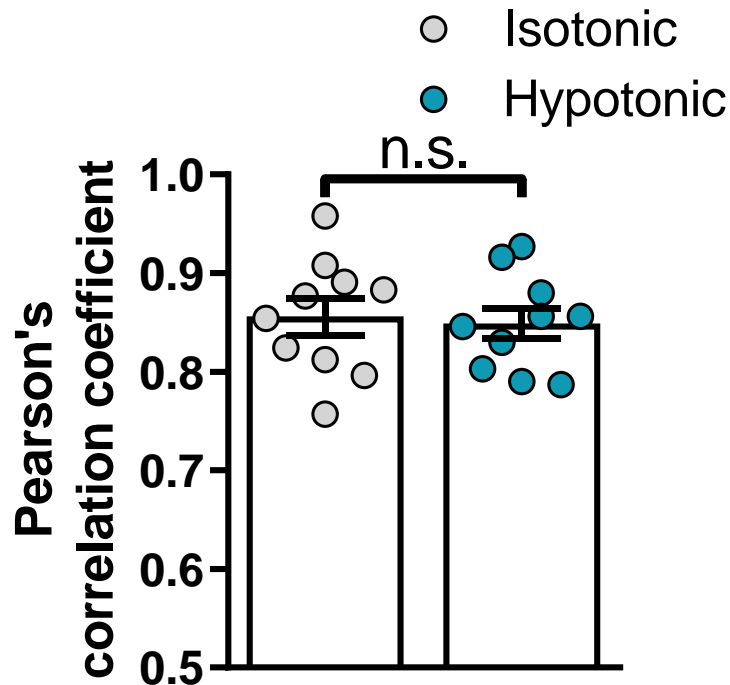

**Supplementary figure S4. TIMP-1 GFP plasma membrane localization.** TIMP-1 GFP and BacMam plasma membrane RFP TIRF immunofluorescence signal colocalization calculated as Pearson's correlation coefficient. Histogram bars represent mean  $\pm$  s.e.m; dots represent individual data points. n.s. denotes no significant difference by t-test.

# TIMP-1 mRNA

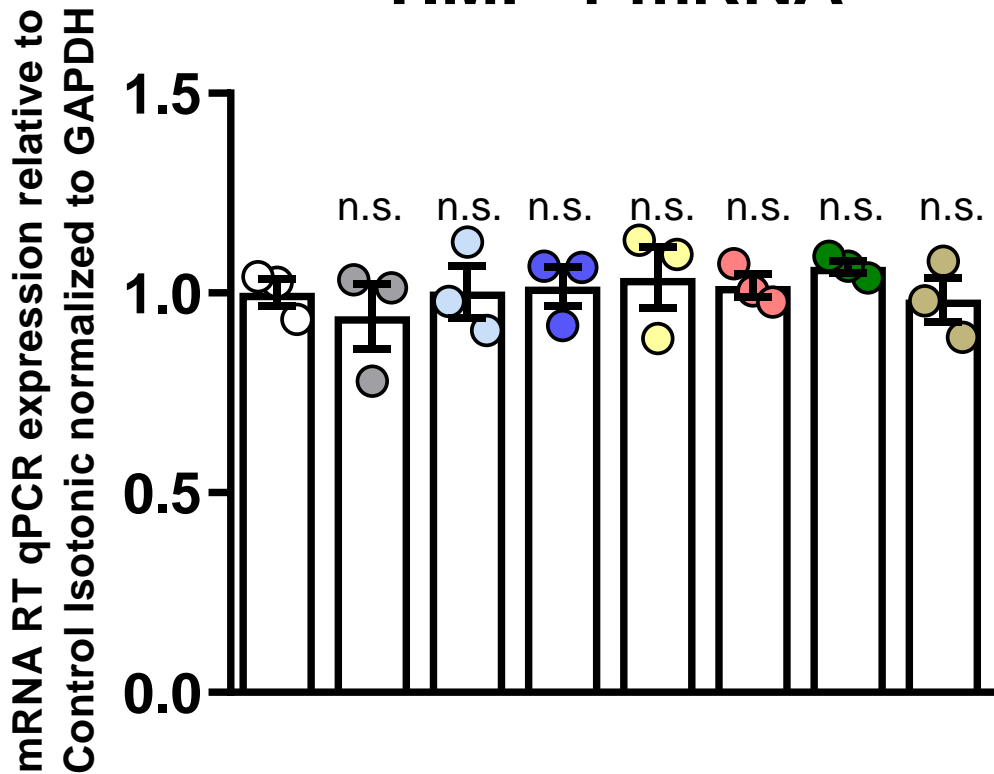

○ Control isotonic   ● Control hypotonic   ● siRNA scramble isotonic   ● siRNA scramble hypotonic   ● Caveolin-1 siRNA hypotonic   ● Dynamin 2 siRNA hypotonic   ●  $\beta 1$  integrin blocking hypotonic   ●  $\beta 3$  integrin blocking hypotonic

**Supplementary Figure S5. mRNA expression of TIMP-1 assayed by RT-qPCR, normalised to control GAPDH relative to control isotonic condition.** Histogram bars represent mean  $\pm$  s.e.m; Data are representative of  $n = 3$  experimental replicates. Markers denote significant difference from control isotonic condition by one way ANOVA with Dunnett's post hoc test, n.s. – not significant.

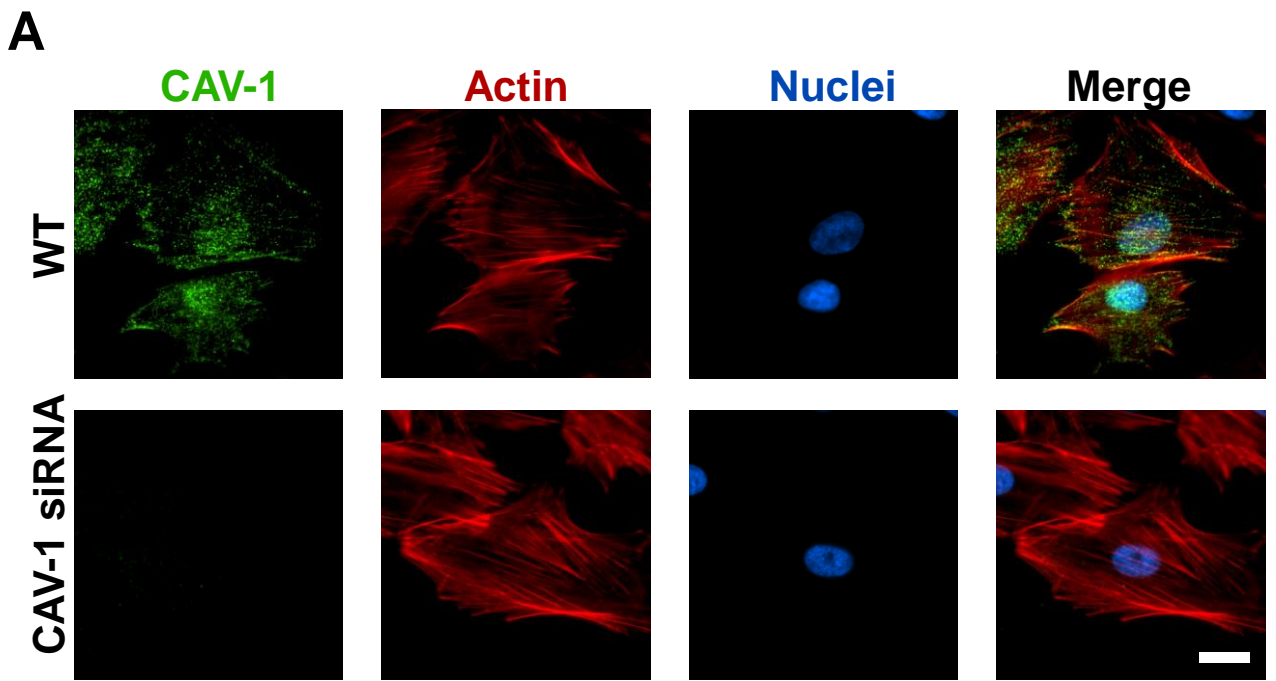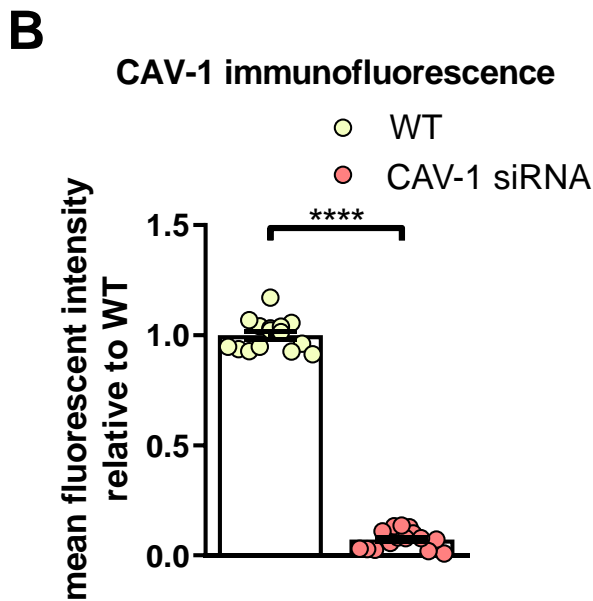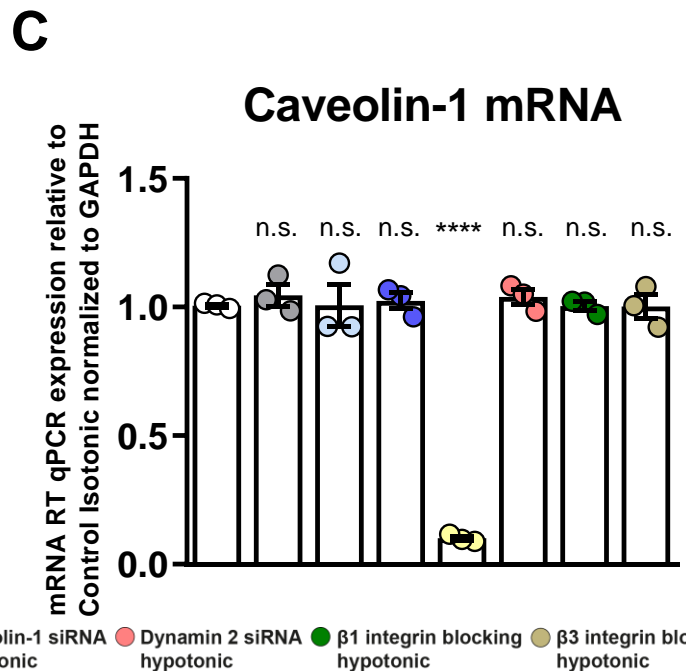

**Supplementary figure S6. Quantification of Caveolin-1 (CAV-1) expression in HSCs.** (A) Representative immunofluorescent images demonstrating wildtype (WT) and CAV-1 siRNA transfected hepatic stellate cells (HSCs) immunostained for CAV-1; (B) Quantification of mean fluorescence intensity of (A). Number of cells – 15 for each condition. Scale bar represents 20  $\mu\text{m}$ . Histogram bars represent mean  $\pm$  s.e.m; Data are representative of  $n = 3$  experimental replicates. \*\*\*\*  $p < 0.0001$  by t-test. (C) Caveolin-1 expression assayed by RT-qPCR, normalised to control GAPDH relative to control isotonic condition. Histogram bars represent mean  $\pm$  s.e.m; dots represent individual data points. Markers denote significant difference from control isotonic condition by one way ANOVA with Dunnett's post hoc test, \*\*\*\*  $p < 0.0001$ .

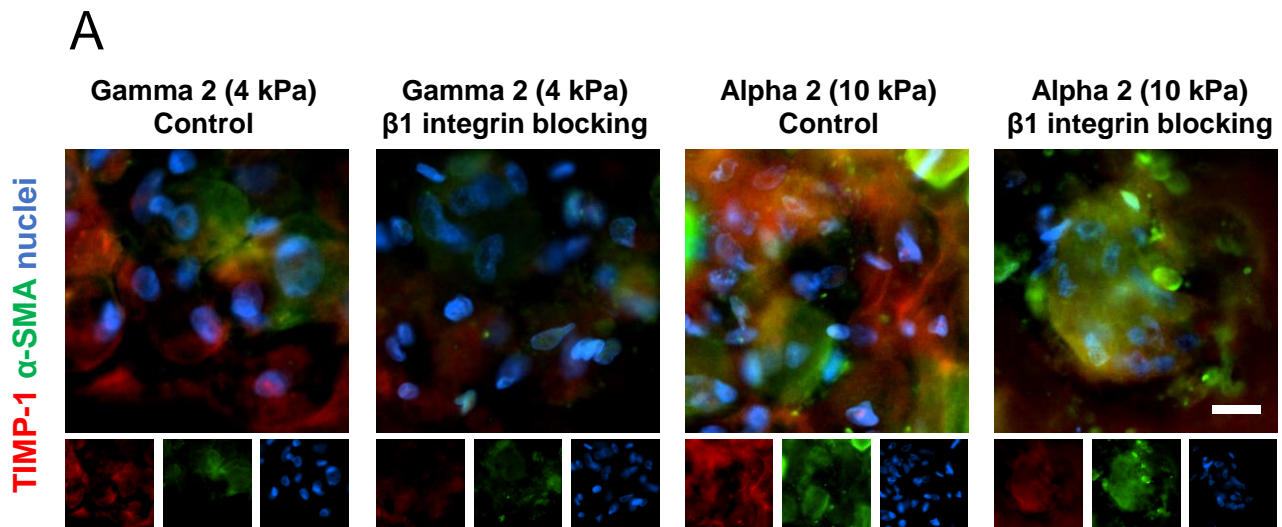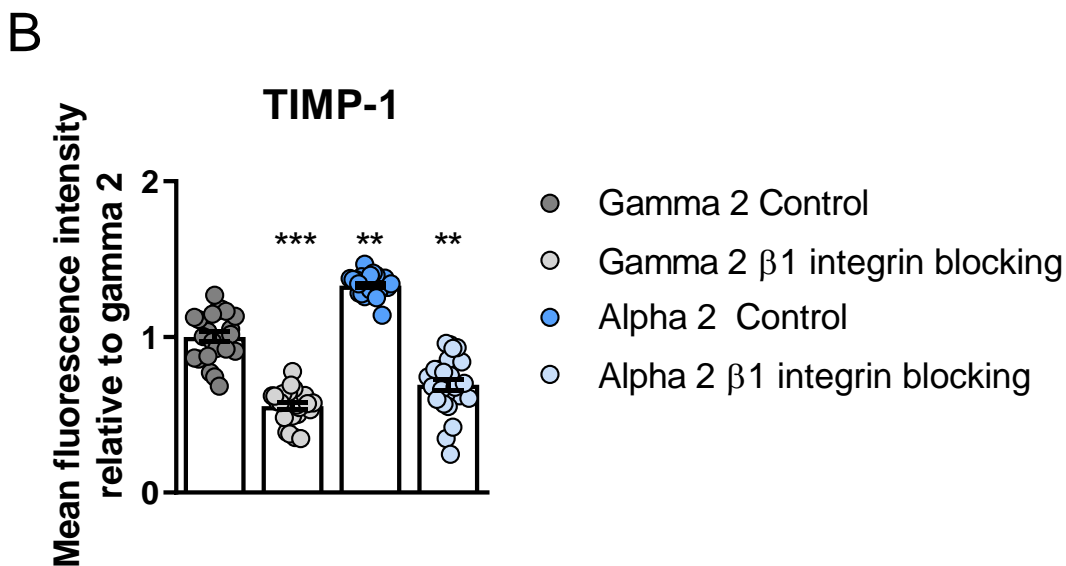

**Supplementary Figure S7.  $\beta$ 1 Integrin blocking downregulates TIMP-1 on 3D self-assembling peptide gels mimicking healthy and fibrotic stiffnesses.** (A) Representative epifluorescent images of hepatic stellate cells (control – no treatment, and  $\beta$ 1 integrin blocking) TIMP-1 immunostaining of formalin fixed, paraffin embedded soft - 4 kPa gamma 2, and stiff - 10 kPa alpha 2 3D MBG PeptiGels; TIMP-1 (red), alpha smooth muscle actin (green) and nuclei (blue), scale bar is 20  $\mu$ m. n=23 ROIs for each group. Mean  $\pm$  s.e.m. Markers denote significant difference from control Gamma 2 Control condition by one way ANOVA with Dunnett's post hoc test, \*\* 0.001 < p < 0.01, \*\*\* 0.0001 < p < 0.001.
